# Supplementary material for: Acetylation regulates tropomyosin function in the fission yeastSchizosaccharomyces pombe
Source: Oxford University Press journal article supplement (doi:10.1242/jcs.001115), 2007-04-23
Supplement: jcs001115tables1.pdf [file jcs001115tables1.pdf]

**Table S1. Strains used in the study.**

| <b>Strain Number</b> | <b>Genotype</b>                                                                    | <b>Reference</b>            |
|----------------------|------------------------------------------------------------------------------------|-----------------------------|
| DPM126               | <i>h<sup>+</sup> myo2-gfp:kanMX6 cdc25-22 leu1-32 ura4-d18 his2-d1</i>             | (Mulvihill and Hyams, 2002) |
| DPM170               | <i>h<sup>-</sup> nda2-km52 leu1-32</i>                                             | (Umesono et al., 1983)      |
| DPM219               | <i>h<sup>-</sup> ade6-M210 leu1-32 ura4-d18</i>                                    | Lab Stock                   |
| DPM279               | <i>h<sup>-</sup> cdc3-124 leu1-32</i>                                              | (Nurse et al., 1976)        |
| DPM331               | <i>h<sup>-</sup> cdc8-110</i>                                                      | (Nurse et al., 1976)        |
| DPM353               | <i>h<sup>+</sup> leu1-32 ura4-d18 his2- pREP41</i>                                 | This study                  |
| DPM354               | <i>h<sup>+</sup> leu1-32 ura4-d18 his2- pREP41cdc8<sup>+</sup></i>                 | This study                  |
| DPM703               | <i>leu1::nmt41gfp-cdc8:ura4 ura4-d18</i>                                           | This study                  |
| DPM856               | <i>h<sup>-</sup> cdc8-110 leu1::nmt41:ura4 ura4-d18</i>                            | This study                  |
| DPM857               | <i>h<sup>-</sup> cdc8-110 leu1::nmt41cdc8<sup>+</sup>:ura4 ura4-d18</i>            | This study                  |
| DPM862               | <i>h<sup>-</sup> cdc8-110 leu1::nmt41cdc8-AS:ura4 ura4-d18</i>                     | This study                  |
| DPM860               | <i>h<sup>-</sup> cdc8-110 leu1::nmt41<math>\alpha</math>smTm:ura4 ura4-d18</i>     | This study                  |
| DPM861               | <i>h<sup>-</sup> cdc8-110 leu1::nmt41<math>\alpha</math>skTm:ura4 ura4-d18</i>     | This study                  |
| DPM858               | <i>h<sup>-</sup> cdc8-110 leu1::nmt41TPM1:ura4 ura4-d18</i>                        | This study                  |
| DPM859               | <i>h<sup>-</sup> cdc8-110 leu1::nmt41TPM2:ura4 ura4-d18</i>                        | This study                  |
| DPM751               | <i>h<sup>-</sup> cdc8-110 leu1::nmt41gfp-cdc8:ura4 ura4-d18</i>                    | This study                  |
| DPM809               | <i>h<sup>-</sup> cdc25-22 leu1::nmt41gfp-cdc8:ura4 ura4-d18<sup>+</sup></i>        | This study                  |
| DPM837               | <i>leu1::nmt41gfp-TPM1:ura4 ura4-d18</i>                                           | This study                  |
| DPM838               | <i>leu1::nmt41gfp-TPM2:ura4 ura4-d18</i>                                           | This study                  |
| DPM841               | <i>leu1::nmt41gfp-<math>\alpha</math>smTm:ura4 ura4-d18</i>                        | This study                  |
| DPM839               | <i>leu1::nmt41gf-p<math>\alpha</math>skTm:ura4 ura4-d18</i>                        | This study                  |
| DPM903               | <i>h<sup>-</sup> cdc8-110 leu1::nmt41gfp-TPM1:ura4 ura4-d18</i>                    | This study                  |
| DPM907               | <i>h<sup>-</sup> cdc8-110 leu1::nmt41gfp-TPM2:ura4 ura4-d18</i>                    | This study                  |
| DPM924               | <i>h<sup>-</sup> cdc8-110 leu1::nmt41gfp-<math>\alpha</math>smTm:ura4 ura4-d18</i> | This study                  |
| DPM914               | <i>h<sup>-</sup> cdc8-110 leu1::nmt41gfp-<math>\alpha</math>skTm:ura4 ura4-d18</i> | This study                  |
